# Supplementary figures and images for: Influenza Vaccination in Children Younger than 5 Years in the Region of Murcia (Spain), a Comparative Analysis among Vaccinating and Non-Vaccinating Parents: Data from the FLUTETRA Study
Source: MDPI journal article supplement (doi:10.3390/vaccines12020192), 2024-02-13

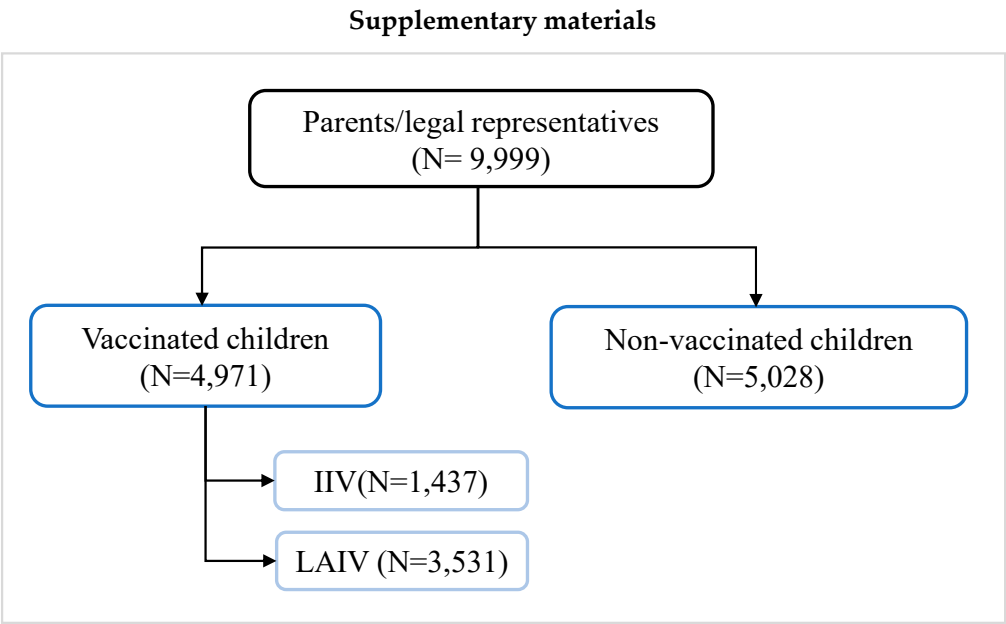

**Figure S1.** Data collection chart

Supplement: s1 [file s1]
